# Supplementary material for: Impact of early palliative care on patients with advanced lung cancer: a retrospective real- world cohort study using the TriNetX network
Source: Research Square preprint supplement (doi:10.21203/rs.3.rs-8134475/v1), 2025-12-22
Supplement: Supplementary file 1 [file 24b0b97ba147976da46789b1.docx]

**Supplementary 1 Codes and variables**

| Code | Variable name |
| --- | --- |
| AI | Age at Index |
| 9081 | Body weight |
| 89243-0 | Karnofsky performance status (0-100) |
| Z87.891 | Smoking history |
| **Gender** |  |
| M | Male |
| F | Female |
| **Race** |  |
| 2106-3 | White |
| 2054-5 | Black or African American |
| 2028-9 | Asian |
| **Medication** |  |
| 7052 | Morphine |
| **Symptoms** |  |
| R06.00 | Breathlessness |
| R11 | Nausea/vomiting |
| R52 | Pain |
| R63.0 | Anorexia |
| F01-F99 | Depression |
| **Comorbidity** |  |
| J44 | Chronic obstructive pulmonary disease |
| C79.3, C80.1 | Brain metastasis |
| **Respiratory condition** |  |
| J96 | Respiratory failure |
| J18 | Pneumonia |
| 3193, J90, J98.4 | Pleural effusion |
| I27 | Pulmonary hypertension |
| E83.52 | Hypercalcemia |
| I87.1 | Superior vena cava syndrome |
| **Invasive procedure** |  |
| 52765003 | Intubation 0-30 days |
| 31500 | Intubation 31-365 days |
| 232674004 | Intubation >365 days |
| **Mortality** |  |
| Decease | Death |
